# Supplementary material for: Defining the 3′Epigenetic Boundary of the FMR1 Promoter and Its Loss in Individuals with Fragile X Syndrome
Source: MDPI journal article supplement (doi:10.3390/ijms241310712), 2023-06-27
Supplement: s1 [file s1]

# Defining a novel 3' epigenetic boundary of the *FMR1* promoter lost in individuals with fragile X syndrome.

## Supplementary Online Content

**Note S1.** Genomic organization and 5' *FMR1* targeted regions.

**Figure S1.** Xq27.3 sequence organization and specific CpG site locations on GenBank L29074 in relation to regions targeted by EpiTYPER system based methylation analysis.

**Figure S2.** The CG dinucleotide density in the regions proximal to the FREE2 3' Boundary.

**Figure S3.** Intergroup comparison heat-maps of P values for the raw data presented in Figure 2 of CpG unit specific methylation in male controls CGG<40 (HC n=20), males with premutation (PM n=39), FM with developmental delay and 100% methylated by Southern blot (FM n=73), FM CGG size mosaics (PM/FM n=27), FM methylation mosaics (FM Met. Mos. n=21) and 'high functioning' males (IQ>70) with an unmethylated FM (UFM n=5).

**Figure S4.** Intergroup comparison heat-maps of P values for the raw data presented in Figure 3 of CpG unit specific methylation in female controls CGG<40 (n=75), females with a PM (n=157), FM (n=132), as well as females mosaic for PM and FM alleles (n=8).

**Table S1.** Nine CpG units overlapping between amplicons FREE2 (B), (C) and (D).

**Table S2.** Putative regulatory motifs proximal to the *ASFMR1* transcription start site within the FREE3 region.

**Table S3.** Mann-Whitney test P-value comparison matrix between males with *FMR1* expansions and control groups plotted in Figure 4.

**Table S4.** Sample size, median and interquartile range (IQR) for selected FREE2 and FREE3 CpG units from Figure 4 and Table S3.

**Table S5.** Amplicon details used for methylation analysis using the EpiTYPER system of the regions proximal to the CGG expansion at the Xq27.3 locus.

**Table S6.** Details of the post-mortem brain tissue processing, age and the clinical phenotype.

## Note S1

### Genomic organization and 5' *FMR1* targeted regions.

For cross validation purposes the assays were designed so that there was overlap between CpG units on the 5' and 3' ends on most amplicons (Table S1). Based on this, the EpiTYPER system-based analysis in venous blood DNA provided methylation ratio values for 2 CpG units within *FMR1* exon 1 and 43 CpG units within *FMR1* intron 1 and 2. Of these 7 units overlapped between amplicons FREE2(B), FREE2(C) and FREE2(E), and consistently provided identical results for the overlapping units. Considering this study targeted a total of 34 novel CpG units within the 5' portion of the *FMR1* intron 1, a total of 22 units were defined as novel epigenetic biomarkers differentially methylated in blood DNA within intron 1 between individuals with *FMR1* expansions and control group in males and females. These units encompassed 35 CpG sites that have not been previously examined and defined as fragile X related biomarkers in venous blood DNA. We found that the FREE2 region spanned ~1.3 kilobases downstream from the exon1/intron1 boundary to a novel 3' epigenetic boundary identified within the FREE2(E) amplicon. The position of this boundary in venous blood DNA was identical to that in lymphoblast cell lines described in our previous work [16].

In the *FMR1* intron 2 we have examined methylation of the 2 CpG sites denoted as FREE3 (Figure 1). These sites flank *ASFMR1* transcription start site on either side with a TATA box immediately upstream of the FREE3 CpG1 [Figure S1 and Figure S2]. In our previous work both FREE3 (F3)CpG1 and (F3)CpG2 were hypomethylated in FXS cell lines that had significantly reduced *ASFMR1* expression compared to those from controls and individuals with unmethylated full mutation (UFM) alleles [16], suggesting that decreased methylation of these sites is involved in down regulation of *ASFMR1* expression in FXS. This gene regulation hypothesis is consistent with previous reports of methylation changes in close proximity to a TATA box being involved in regulation of gene expression originating from nearby transcription sites [38].

(13758) - CGG expansion – (13862)

(13951) fP(200-400)

FREE2(A) 5' Intron 1 { ctaagagaa gatggaggag ctggtggagg aagtc1gggg ctccaatggc2gctttctacaag >> gtacttgg ctctagggca ggccccatct tc3gcccttcc ttccctccct tttctcttg  
gtgtc4ggc5gggaggcagggc c6ggggccctc ttccc7gagca cc8gc9gctgg gtgccagggc ac10gctc11ggc12g ggatgttgg ggaggggaag gactggactt aagacctatt  
ggagacccct ct

(14192)

(14,167) rP(200-400) fP(400-600)

FREE2(B) 5' Intron 1 { acttggggcc tgttgaagc cctctcc1g actcc2gaga ggccctaga3 gcctatc4ga aatgagagac c << >> agc5gagga gagggttctc tttc6ggc7g cc8gagcccc9g  
cc10gggggtg agctggggat gggc11gagg gcc12ggc13g gcaggtacta gagcc14ggg c15gggaagg gcc16gaat c17ggc18gc taagtgc19g gc20gatggc  
ttattcccc ttctctaac atcatctcc agc21gggat cc22ggggc>>t gtc23gtgtg ggtagtgtg g<<aggagc24g gggggc25gc ttacgc26g ggcc27gcct cctgcagc28g  
caagaggggc ttacgtctc ctttggctc tctttcc29g gtctagcatt gggacttc30g gagagctca ctgttcggg c31gagggctgt gaagaaagag tagtaagaag  
fP(600-800) rP(400-600)  
fP(800-1000) rP(600-800)  
C32ggtagtc33>>gg caccaaatca caatggcaac tgatttttag tggct<<tct

(14,620)

(14,466)

FREE2(C) 5' Intron 1 { caagaaggctcagg tctctttg cttctcttt cc1ggtctagc attggactt c2ggagagctc cactgttctg ggc3gagggct ggaagaaag agtagtaaga agc4ggtagtc5g gcaccaa  
cacaatggca actgattttt agtgccttct ctttgggat ttc6ggaggag attttagatc caaaatttc aggaagacc ctaacatggcc cagcagtga ttgaagaagt tgatcatc7gt  
gaatattc8gc9tcccccttt ttgtaaac10g ggtaaatc aggaatgcac atgcttc

(14,767)

(14,652)

FREE2(D) 5' Intron 1 { aaaaatttc aggaagacct aacatggcc cagcagtga ttgaagaagt tgatcatc1gt gaatattc2gc3gtcccccttt ttgtaaac4g ggtaaatc aggaatgcac atgctcagc5g  
fP(1000-1200) rP(800-1000)  
Tctaaaa>>ccattagcagc6g ctgct<<actta aaaaattgtgt gtgtgtgttt aagtttcaa agactaaat atatgcatg aacttcagg taattaactg agagtatat attactagg  
cattttttt ttaactgagc7g aaaaattt ttgtgccct aagaacttg accaatttcc ttgaattg ttgtttgca gtgactgaa ttgttaggc t<<ttatatagg cattcatggg ttactgtgc  
ttttt

(14,880)

2 CpG sites not analysed { (15,025) aaagt tacaccattg cagatcaact aacaccttc agtttataaa ggaagattta caaatgtat gtagcagtag tgcgtttgtt ggtatgtagg tgctgtataa attcatctat aaattctcat  
ttccttttga atgtctataa cctctttcaa taatatccca cttactaca gtattttggc aatagaaggt gctgttgaa ggaaggctgg aaaatagcta ttacagctgt ccaacacat tcttaaatg  
attgta (15,646)

(15,280)

FREE2(E) 5' Intron 1 { gaat gcttgaatg tttcagacag gaca1gtttg gctataggaa aataacaat tgactttatt ctgtgtttac caattttatg aagacattg gagatcagta tattcataa atgagtaaag  
tatgtaaac gtccatact ttgagcacia agataaagcc tttgtctgta aaaggaggca aaaggtaac cc2gc3gtttat gttcttaaca gtctcatgaa tatgaattg tttcagttga cttgcagtc  
aaaattttaa tttcattgat tttattgat cataattct tctgtgtagt ttgc4gtagaa tcgttcac5gg tccatagata gtggttttg tccatagatt tctggc

(15,646)

FREE3 { (23,701)  
ttttcttac acaggcattt gtaaaggatg ttcatgaaga ttcaataaca gttgcatttg aaaacaagta agtgtctc1gt taTA TAATTt taatgatgag gttctttaat atTTTATGCT AATTctattc  
ttcatTTTT aaaaattcaa gtccagtttg agtgcttttc aggaatggat ctctcatgta ctgactgaga agtttctgaa caactcagta ttaactaat \*\* ggaaatgactg ttctgtctaa tgtctggag  
gtcccttatt gtatgtatt gatccttac2g tcttaattcc ctgaatgtg aagaaagaaa ccagaga

(24,027)

**Figure S1. Xq27.3 sequence organization and specific CpG site locations on GenBank L29074 L38501 in relation to regions targeted by EpiTYPER system-based methylation analysis.** Primers utilized for EpiTYPER system based methylation analysis targeted 6 regions at the Xq27.3 locus designated as FREE2(A); FREE2(B); FREE2(C); FREE2(D); FREE2(E), FREE2(F) and FREE3 (color coded as in Figure 1). Individual CpG sites within each region are numbered accordingly. Motifs proximal to the *ASFMR1* transcription start site within the FREE3 region sites are indicated in capital font and are listed/identified in Table S2. \*\* in red indicates *ASFMR1* transcription start site. The

FREE2 3' boundary located between CpG1 and CpG2/3 of FREE2(E) which is underlined in the sequence and highlighted in red. Text highlighted in pink indicates CTCF binding sites from UCSF Chip-Seq: CTCF site #1 binds FREE2 (A)CpG10-12 to FREE2 (B) CpG32; CTCF site #2 binds FREE2(D) CpG5-7. >> and << symbols indicate forward and reverse primers used in ChIRP to show portion of FMR1 intron 1 that binds RNA in con and FXS human embryonic stem cells (hESCs) at day 45 of differentiation (Figure 4 and Figure S16 and Table S1 in [21]).

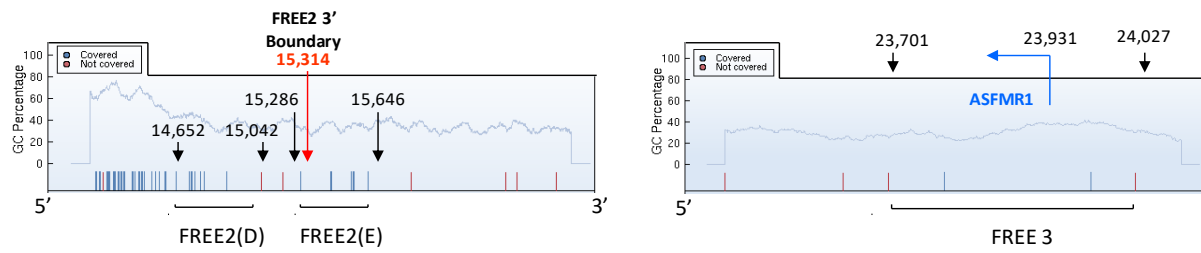

**Figure S2. The CG dinucleotide density in the regions proximal to the FREE2 3' Boundary.** The CpG sites that have been analysed for methylation status are represented in blue on the X axis, while sites not covered by our assays are represented in red. The coordinates of the FREE2(D) and FREE2(E) assays on the GenBank L29074 are also indicated.

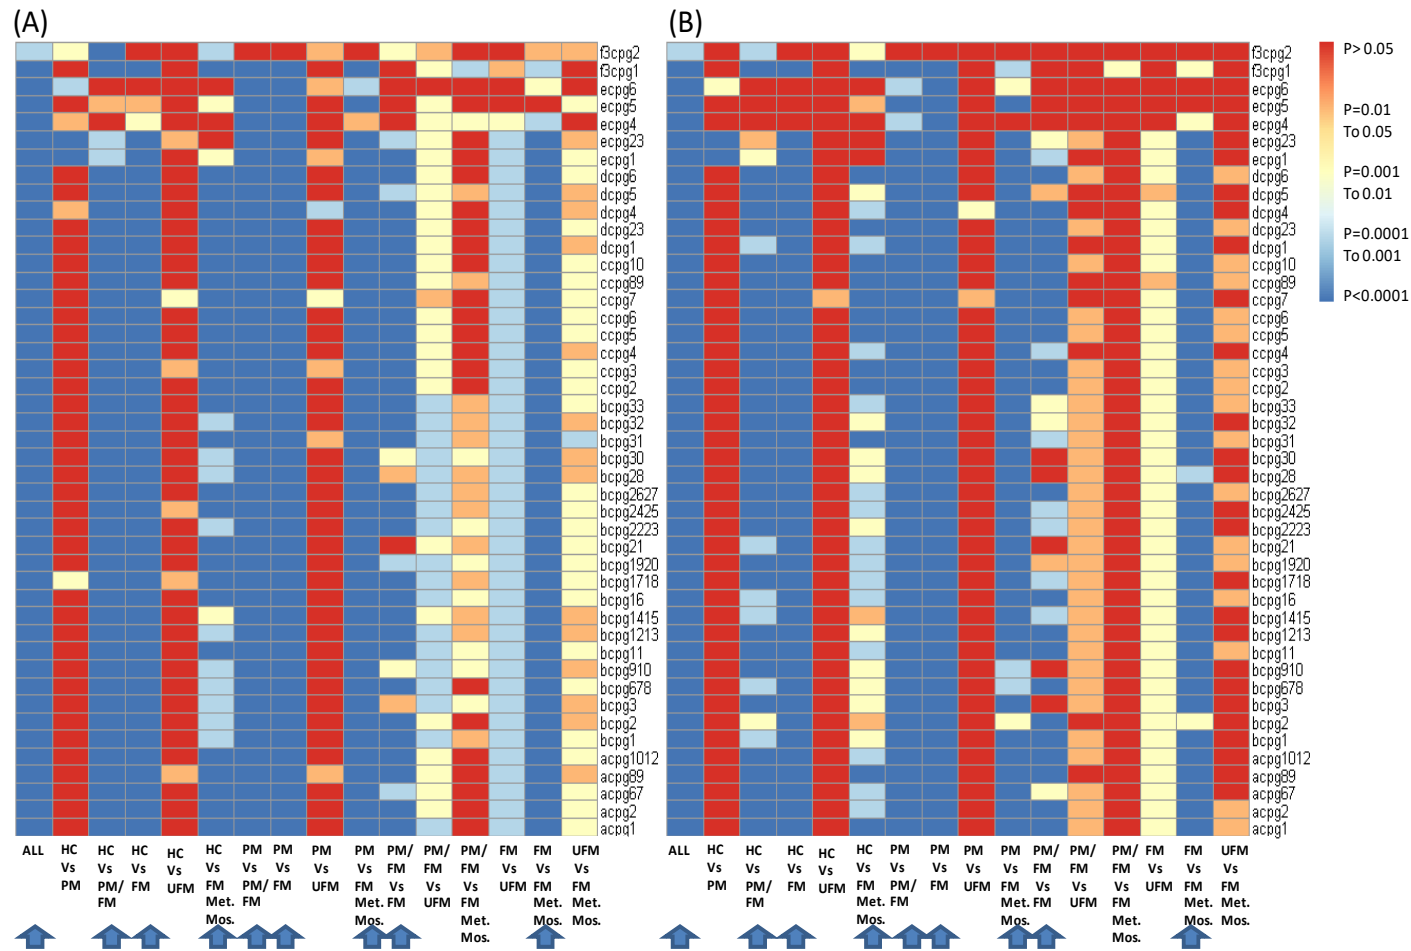

**Figure S3. Intergroup comparison heat-maps of P values for the raw data presented in Figure 2 of CpG unit specific methylation in male controls CGG<40 (HC n=20), males with premutation (PM n=39), FM with developmental delay and 100% methylated by Southern blot (FM n=73), FM CGG size mosaics (PM/FM n=27), FM methylation mosaics (FM Met. Mos. n=21) and ‘high functioning’ males (IQ>70) with an unmethylated FM (UFM n=5). Each row indicates a different CpG unit, with bottom rows representing the 5’ and top rows representing the 3’ CpG units. Each column represents a different intergroup comparison. The P value heat-maps for (A) represent unadjusted comparisons, and (B) represents adjusted comparisons using bonferroni correction method for multiple testing, where the number of tests was equivalent to the number of pairwise comparisons. Note: The blue arrows indicate the most consistently significant P values for inter-group comparisons between CpG units and between comparisons “unadjusted” and “adjusted” for multiple comparisons.**

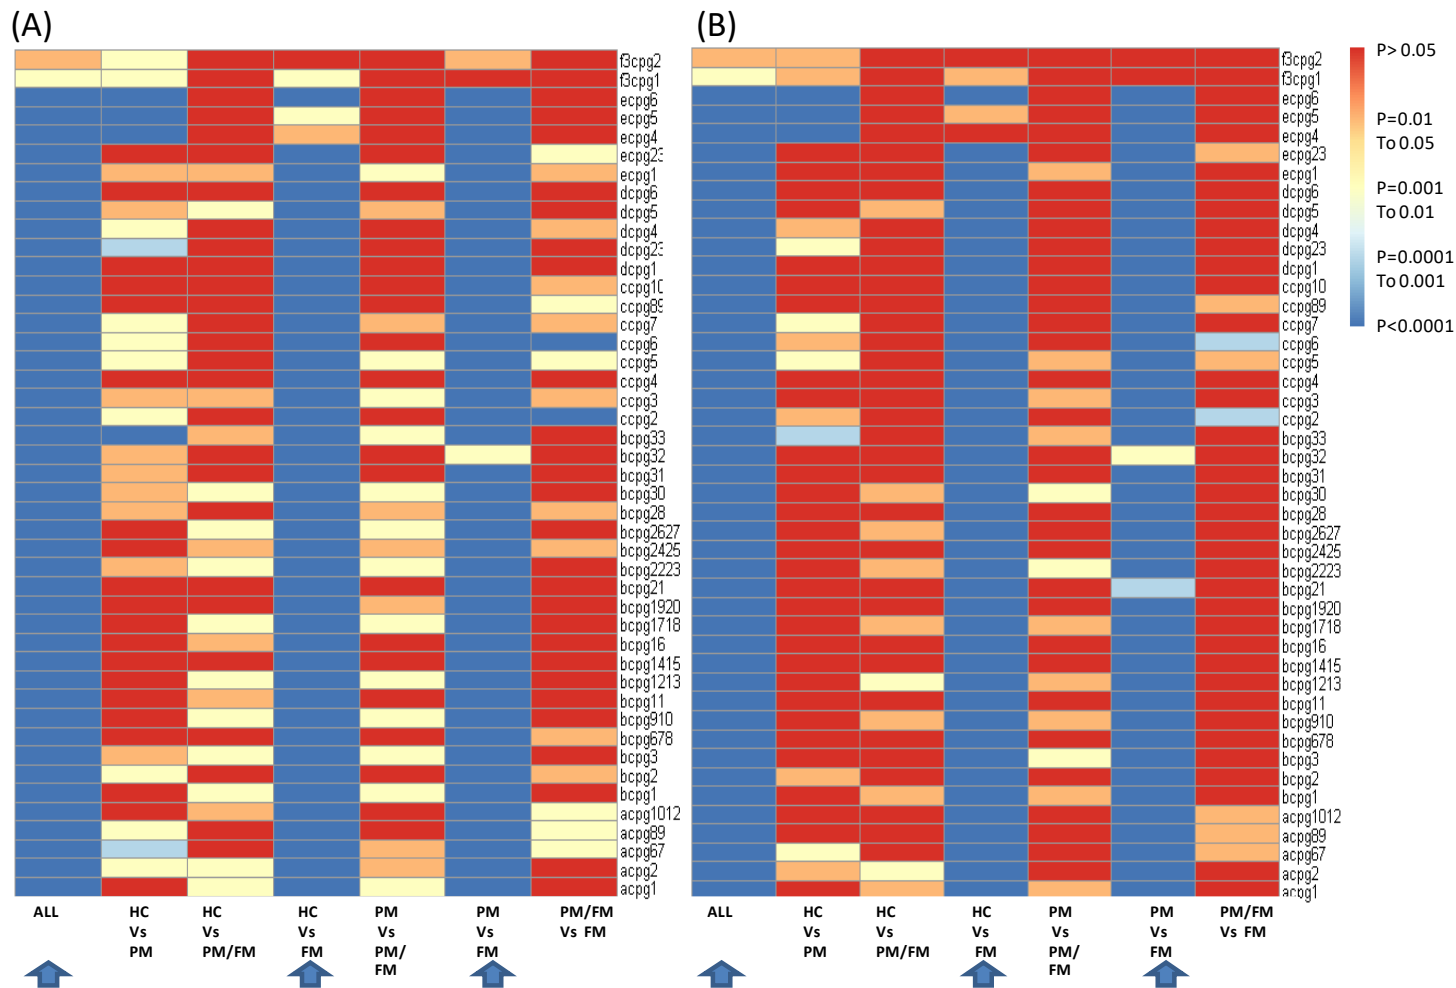

**Figure S4. Intercomparison heat-maps of P values for the raw data presented in Figure 3 of CpG unit specific methylation in female controls CGG<40 (n=75), females with a PM (n=157), FM (n=132), as well as females mosaic for PM and FM alleles (n=8).** Each row indicates a different CpG unit, with bottom rows representing the 5' and top rows representing the 3' CpG units. Each column represents a different intergroup comparison. The P value heat-maps for (A) represents unadjusted comparisons, and (B) represents adjusted comparisons using bonferroni correction method for multiple testing, where the number of tests was equivalent to the number of pairwise comparisons. Note: The blue arrows indicate the most consistently significant P values from inter-group comparisons between CpG units and between comparisons "unadjusted" and "adjusted" for multiple comparisons.

**Table S1.** Nine CpG units overlapping between amplicons FREE2(B), (C) and (D).

\*Note: Each row represents identifications of the overlapping CpG sites.

| 5'Amplicon ID: | CpG unit ID:      | 3'Amplicon ID: | CpG unit ID:     |
|----------------|-------------------|----------------|------------------|
|                |                   |                |                  |
| FREE2B         | 29 (not examined) | FREE2C         | 1 (not examined) |
| FREE2B         | 30                | FREE2C         | 2                |
| FREE2B         | 31                | FREE2C         | 3                |
| FREE2B         | 32                | FREE2C         | 4                |
| FREE2B         | 33                | FREE2C         | 5                |
|                |                   |                |                  |
| FREE2C         | 7                 | FREE2D         | 1                |
| FREE2C         | 8.9               | FREE2D         | 2.3              |
| FREE2C         | 10                | FREE2D         | 4                |
|                |                   |                |                  |

**Table S2.** Putative regulatory motifs proximal to the *ASFMR1* transcription start site within the FREE3 region.

| Transcription factor sites/potential regulatory motifs | Sequence on the sense strand | Strand  | Sequence homology (%) | Amplicon #  | CpG unit location     |
|--------------------------------------------------------|------------------------------|---------|-----------------------|-------------|-----------------------|
| SRY                                                    | AAACAAA                      | LEADING | 100                   | 5' of FREE3 | 5' of FREE3 CpG1      |
| CdxA                                                   | TATAATT                      | LEADING | 99                    | FREE3       | CpG1                  |
| Oct-1                                                  | TTTATGCTAATT                 | LEADING | 99                    | FREE3       | Between CpG1 and CpG2 |



**Table S3.** Mann-Whitney test P-value comparison matrix between males with *FMR1* expansions and control groups plotted in Figures 4 and 5.

|                               |         | <u>(E)CpG1</u>  |          |        |          |          |          |
|-------------------------------|---------|-----------------|----------|--------|----------|----------|----------|
|                               |         | HC              | PM       | UFM    | FM only  | FM sm    | FM meth  |
| <u>(E)</u><br><u>CpG2.3</u>   | HC      |                 | < 0.0001 | 0.2751 | < 0.0001 | 0.0003   | 0.0041   |
|                               | PM      | < 0.0001        |          | 0.0384 | < 0.0001 | < 0.0001 | < 0.0001 |
|                               | UFM     | 0.0104          | 0.1881   |        | 0.0002   | 0.0050   | 0.0097   |
|                               | FM only | < 0.0001        | < 0.0001 | 0.0002 |          | < 0.0001 | < 0.0001 |
|                               | FM sm   | 0.0010          | < 0.0001 | 0.0032 | 0.0002   |          | 0.1042   |
|                               | FM meth | 0.1589          | < 0.0001 | 0.0134 | < 0.0001 | 0.0739   |          |
|                               |         |                 |          |        |          |          |          |
|                               |         | <u>(E)CpG4</u>  |          |        |          |          |          |
|                               |         | HC              | PM       | UFM    | FM only  | FM sm    | FM meth  |
| <u>(A)</u><br><u>CpG10-12</u> | HC      |                 | < 0.0001 | 0.2751 | < 0.0001 | 0.0003   | 0.0041   |
|                               | PM      | < 0.0001        |          | 0.0384 | < 0.0001 | < 0.0001 | < 0.0001 |
|                               | UFM     | 0.0104          | 0.1881   |        | 0.0002   | 0.0050   | 0.0097   |
|                               | FM only | < 0.0001        | < 0.0001 | 0.0002 |          | < 0.0001 | < 0.0001 |
|                               | FM sm   | 0.0010          | < 0.0001 | 0.0032 | 0.0002   |          | 0.1042   |
|                               | FM meth | 0.1589          | < 0.0001 | 0.0134 | < 0.0001 | 0.0739   |          |
|                               |         |                 |          |        |          |          |          |
|                               |         | <u>(F3)CpG1</u> |          |        |          |          |          |
|                               |         | HC              | PM       | UFM    | FM only  | FM sm    | FM meth  |
| <u>(F3)</u><br><u>CpG2</u>    | HC      |                 | 0.0646   | 0.1162 | < 0.0001 | < 0.0001 | < 0.0001 |
|                               | PM      | 0.0049          |          | 0.3168 | < 0.0001 | < 0.0001 | < 0.0001 |
|                               | UFM     | 0.2449          | 0.0400   |        | 0.0150   | 0.0096   | 0.2400   |
|                               | FM only | 0.2528          | 0.0581   | 0.1813 |          | 0.1440   | 0.0002   |
|                               | FM sm   | < 0.0001        | 0.2055   | 0.0206 | 0.0036   |          | 0.0005   |
|                               | FM meth | 0.0003          | 0.8100   | 0.0300 | 0.0445   | 0.2929   |          |
|                               |         |                 |          |        |          |          |          |

**Note:** HC= male controls; PM=permutation; UFM = unmethylated FM by southern blot; FM only = only FM alleles detected 100% methylated by Southern blot; FM sm = FM CGG size mosaics; FM meth = FM methylation mosaics. Upper triangle in red represent the intergroup comparison p-values for (E)CpG1, (E)CpG4, (F3)CpG1. Lower triangle in blue represent the intergroup comparison p-values for (E)CpG2.3, (A)CpG10-12, (F3)CpG2.

**Table S4.** Sample size, median and interquartile range (IQR) for selected FREE2 and FREE3 CpG units from Figures 4 and 5 and Table S3.

|                        | N   | Median   | IQR   | n   | Median      | IQR   |
|------------------------|-----|----------|-------|-----|-------------|-------|
|                        |     | (E)CpG1  |       |     | (E)CpG2.3   |       |
| All                    | 163 | 0.650    | 0.625 | 178 | 0.918       | 0.285 |
| HC                     | 15  | 0.220    | 0.100 | 19  | 0.740       | 0.075 |
| PM                     | 32  | 0.103    | 0.033 | 36  | 0.590       | 0.093 |
| UFM                    | 5   | 0.170    | 0.075 | 5   | 0.655       | 0.060 |
| FM only                | 69  | 0.790    | 0.115 | 73  | 0.950       | 0.020 |
| FM CGG size mosaics    | 22  | 0.658    | 0.345 | 24  | 0.930       | 0.090 |
| FM methylation mosaics | 20  | 0.423    | 0.425 | 21  | 0.820       | 0.220 |
|                        |     | (E)CpG4  |       |     | (A)CpG10-12 |       |
| All                    | 177 | 0.970    | 0.030 | 171 | 0.500       | 0.760 |
| HC                     | 18  | 0.970    | 0.030 | 17  | 0.015       | 0.020 |
| PM                     | 38  | 0.950    | 0.035 | 39  | 0.020       | 0.014 |
| UFM                    | 5   | 0.955    | 0.020 | 5   | 0.020       | 0.005 |
| FM only                | 72  | 0.980    | 0.020 | 66  | 0.798       | 0.105 |
| FM CGG size mosaics    | 23  | 0.970    | 0.025 | 24  | 0.615       | 0.408 |
| FM methylation mosaics | 21  | 0.965    | 0.020 | 20  | 0.258       | 0.560 |
|                        |     | (F3)CpG1 |       |     | (F3)CpG2    |       |
| All                    | 180 | 0.888    | 0.110 | 177 | 0.865       | 0.045 |
| HC                     | 20  | 0.968    | 0.023 | 18  | 0.880       | 0.025 |
| PM                     | 39  | 0.958    | 0.033 | 39  | 0.858       | 0.063 |
| UFM                    | 5   | 0.940    | 0.040 | 5   | 0.900       | 0.025 |
| FM only                | 72  | 0.850    | 0.053 | 69  | 0.877       | 0.050 |
| FM CGG size mosaics    | 25  | 0.835    | 0.083 | 27  | 0.855       | 0.060 |
| FM methylation mosaics | 19  | 0.910    | 0.065 | 19  | 0.855       | 0.030 |

**Note:** HC= healthy controls; PM=permutation; UFM = unmethylated FM by southern blot; FM only = pure FM 100% methylated by Southern blot.

**Table S5.** Amplicon details used for methylation analysis using the EpiTYPER system of the regions proximal to the CGG expansion at the Xq27.3 locus.

| Amplicon ID:               | PCR conditions:                                                                                                                                                           | Size (bp) | Distance (bp) from:   | Primer sequence:                                                                                                                                                                   |
|----------------------------|---------------------------------------------------------------------------------------------------------------------------------------------------------------------------|-----------|-----------------------|------------------------------------------------------------------------------------------------------------------------------------------------------------------------------------|
| <b>FREE2</b><br><b>(A)</b> | 15 mins at 95°C;<br><br>10 cycles of: 94°C for 30s, 56°C for 30s, 72°C for 1min;<br><br>35 cycles of: 94°C for 30s, 62°C for 30s, 72°C for 1min;<br><br>72°C for 7min     | 242       | 89 –<br><br>3'(CGG)n  | Fw: 5'- <a href="#">AGGAAGAGAG</a> TTGAAGAGAAGAT<br><br>GGAGGAGTTGG -3'<br><br>Rv:5'- <a href="#">CAGTAATACGACTCACTATAGGGAGAAGGCT</a><br>AAAAAACTTCCAACAAACCCC -3'                 |
| <b>FREE2</b><br><b>(B)</b> | 15 mins at 95°C;<br><br>10 cycles of: 94°C for 20s, 54.1°C for 30s, 72°C for 1min;<br><br>35 cycles of: 94°C for 20s, 60.1°C for 30s, 72°C for 1min;<br><br>72°C for 7min | 454       | 330 –<br><br>3'(CGG)n | Fw : 5'- <a href="#">AGGAAGAGAG</a> ATT TGG GGT TTG TTG GAA GTT T-3'<br><br>Rv: 5'- <a href="#">CAGTAATACGACTCACTATAGGGAGAAGGCT</a> AAA<br>AAC CAC TAA AAA TCA ATT ACC A-3'        |
| <b>FREE2</b><br><b>(C)</b> | 15 mins at 95°C;<br><br>10 cycles of: 94°C for 20s, 54.1°C for 30s, 72°C for 1min;<br><br>35 cycles of: 94°C for 20s, 60.1°C for 30s, 72°C for 1min;<br><br>72°C for 7min | 302       | 758 –<br><br>3'(CGG)n | Fw: 5'- <a href="#">AGGAAGAGAG</a> TAA GAG GGT TTT AGG TTT TTT TTG G-3'<br><br>Rv: 5'- <a href="#">CAGTAATACGACTCACTATAGGGAGAAGGCT</a> AAA<br>ACA TAT ACA TTC CTA AAT TTA CCC C-3' |
| <b>FREE2</b><br><b>(D)</b> | 15 mins at 95°C;<br><br>10 cycles of: 94°C for 30s, 56°C for 30s, 72°C for 1min;<br><br>35 cycles of: 94°C for 30s, 62°C for 30s, 72°C for 1min;<br><br>72°C for 7min     | 374       | 902–<br><br>3'(CGG)n  | Fw: 5'-<br><a href="#">AGGAAGAGAG</a> AAAAGTTTATAGGAAGATTTTAATATGG-3'<br><br>Rv: 5'- <a href="#">CAGTAATACGACTCACTATAGGGAGAAGGCT</a><br>AAAAAACACAATAAACCCA<br><br>TAAATACC-3'     |
| <b>FREE2</b><br><b>(E)</b> | 15 mins at 95°C;                                                                                                                                                          | 360       | 1418–<br><br>3'(CGG)n | Fw: 5'-<br><a href="#">AGGAAGAGAG</a> GAATGGTTTGAATGTTTATAGATAGGAT -<br>3'                                                                                                         |

|              |                                                                                                                                                                       |     |                       |                                                                                                                                                              |
|--------------|-----------------------------------------------------------------------------------------------------------------------------------------------------------------------|-----|-----------------------|--------------------------------------------------------------------------------------------------------------------------------------------------------------|
|              | 10 cycles of: 94°C for 30s, 56°C for 30s, 72°C for 1min;<br><br>35 cycles of: 94°C for 30s, 62°C for 30s, 72°C for 1min;<br><br>72°C for 7min                         |     |                       | Rv: 5'- <b>CAGTAATACGACTCACTATAGGGAGAAGGCT</b><br>ACCAAAAATCTAATAACCAAAACCAC-3'                                                                              |
| <b>FREE3</b> | 15 mins at 95°C;<br><br>10 cycles of: 94°C for 30s, 56°C for 30s, 72°C for 1min;<br><br>35 cycles of: 94°C for 30s, 62°C for 30s, 72°C for 1min;<br><br>72°C for 7min | 327 | 9908–<br><br>3'(CGG)n | Fw: 5'-<br><b>AGGAAGAGAG</b> TTTTTTTTTATATAGGTATTTGTAAAGGATG<br>-3'<br><br>Rv: 5'- <b>CAGTAATACGACTCACTATAGGGAGAAGGCT</b><br>TCTCTAATTCTTTCTTCACATTCAAAA -3' |

**Note:** The in vitro transcription related sequences for EpiTYPER based methylation analysis are in blue with forward primer sequence being **AGGAAGAGAG** and reverse primer sequence being **CAGTAATACGACTCACTATAGGGAGAAGGCT**

**Table S6.** Details of the post-mortem brain tissue processing, age and the clinical phenotype.

|                              | Post-mortem interval (hrs) | Age of death | Clinical                       | Frontal cortex (mg) | Cerebellum (mg) |
|------------------------------|----------------------------|--------------|--------------------------------|---------------------|-----------------|
| <b>FM male CASE 1</b>        | 40-44                      | 74           | FSIQ 40 at 65 years            | 500                 |                 |
| <b>FM male CASE 2</b>        | 20                         | 57           | Autism Disorder                | 500                 |                 |
| <b>FM male CASE 3</b>        | 11.5                       | 64           | FSIQ 57 in adulthood           | 500                 |                 |
| <b>PM/FM male CASE 4</b>     | 16                         | 25           | FSIQ 51 at 24 years; no autism | 500                 |                 |
|                              |                            |              |                                |                     |                 |
| <b>Control male CASE 1</b>   | 22                         | 73.5         | Control                        | 91                  |                 |
| <b>Control male CASE 2</b>   | 33                         | 52.1         | Control                        | 101                 |                 |
| <b>Control male CASE 3</b>   | 24                         | 64.1         | Control                        | 81                  |                 |
| <b>Control male CASE 4</b>   | 42.5                       | 72.6         | Control                        | 113                 |                 |
| <b>Control male CASE 5</b>   | 39                         | 56           | Control                        | 106                 |                 |
| <b>Control male CASE 6</b>   | 31.5                       | 63.9         | Control                        | 125                 |                 |
|                              |                            |              |                                |                     |                 |
| <b>Control female CASE 1</b> | 30                         | 59           | Control                        | 92                  | 123             |
| <b>Control female CASE 2</b> | 26.5                       | 73.7         | Control                        | 111                 | 125             |
| <b>Control female CASE 3</b> | 25                         | 71.3         | Control                        | 119                 | 117             |
| <b>Control female CASE 4</b> | 30.5                       | 63.4         | Control                        | 113                 | 139             |
| <b>Control female CASE 5</b> | 19                         | 78.8         | Control                        | 92                  | 85              |
| <b>Control female CASE 6</b> | 24                         | 67.3         | Control                        | 105                 | 110             |
